# Supplementary material for: Ureterorenoscopic (URS) Lithotripsy and Balloon Dilation Cause Acute Kidney Injury and Distal Renal Tubule Damage: A Prospective Study
Source: Hindawi journal article supplement (doi:10.1155/2022/5505969), 2022-01-01
Supplement: f1 [file 5505969.f1.pdf]

**Supplementary Fig 1. (A, B) Impact of ureteral stone size on uNGAL, u- $\alpha$ GST, and u- $\pi$ GST levels in the ureteral stone group; (C) Comparing the urine biomarkers at different time periods between subgroups of stones  $\leq 1$  cm and stones  $> 1$  cm in group**

2.

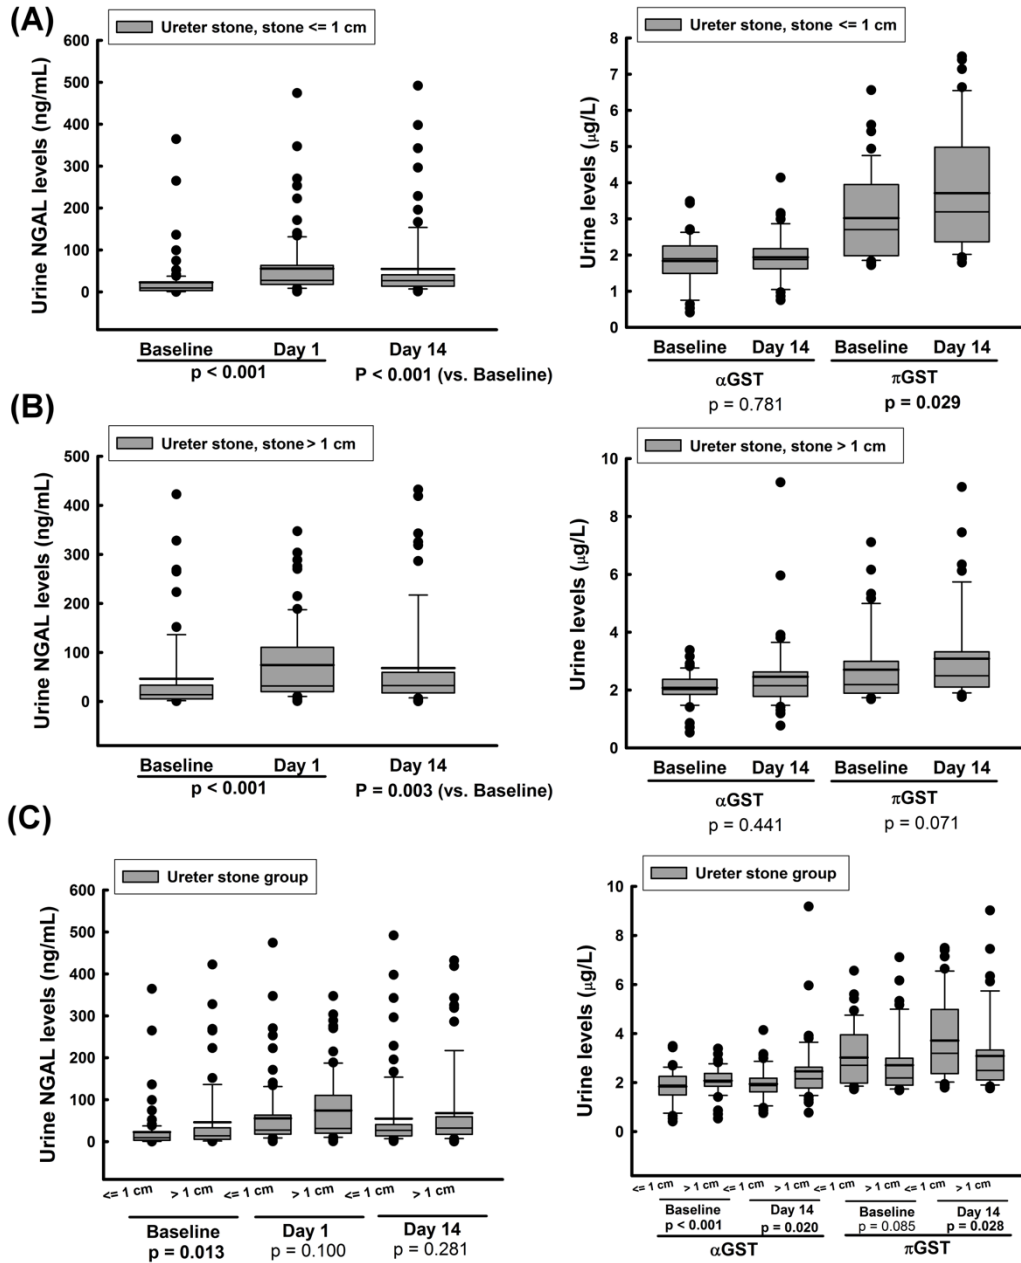

**Supplementary table 1.** Univariate and multivariate logistic regression analysis for the predictors of complete recovery of hydronephrosis (hydronephrosis grade =0 on Day 14 after DBJ removal) after URS.

|                                | Univariate        |                | Multivariate      |                |
|--------------------------------|-------------------|----------------|-------------------|----------------|
|                                | OR (95% CI)       | <i>p</i> value | OR (95% CI)       | <i>p</i> value |
| Age (year)                     | 0.97 (0.95, 0.99) | 0.005*         | 0.96 (0.94, 0.99) | 0.002*         |
| Female (vs. Male)              | 0.76 (0.42, 1.36) | 0.354          |                   |                |
| Group (vs. ureteral stricture) |                   |                |                   |                |
| Ureteral stone                 | 2.49 (0.30, 4.77) | 0.246          |                   |                |
| Staghorn stone                 | 2.92 (0.81, 10.5) | 0.102          |                   |                |
| Stone position                 |                   |                |                   |                |
| Upper                          | 0.62 (0.18, 2.11) | 0.448          |                   |                |
| Middle                         | 0.70 (0.16, 2.98) | 0.630          |                   |                |
| Lower                          | 0.71 (0.20, 2.53) | 0.596          |                   |                |
| eGFR (Baseline)                | 1.02 (1.01, 1.03) | 0.004*         | 1.04 (1.02, 1.06) | <0.001*        |
| BMI (kg/m <sup>2</sup> )       |                   |                |                   |                |
| 18.5-24 (vs. ≤18.5)            | 2.17 (0.40, 11.8) | 0.371          |                   |                |
| 24-30 (vs. ≤18.5)              | 1.43 (0.28, 7.38) | 0.670          |                   |                |
| >30 (vs. ≤18.5)                | 2.57 (0.42, 15.9) | 0.310          |                   |                |
| Stone size                     |                   |                |                   |                |
| 0.4-1.0 (vs. <0.4)             | 2.22 (1.06, 4.66) | 0.035*         | 1.90 (0.81, 4.44) | 0.138          |
| >1.0 (vs. <0.4)                | 2.15 (1.07, 4.30) | 0.031*         | 2.56 (1.13, 5.77) | 0.024*         |
| Presence of UTI                | 0.91 (0.51, 1.63) | 0.742          |                   |                |
| NGAL(Baseline)                 | 1.00 (1.00, 1.00) | 0.357          |                   |                |
| NGAL(1-day)                    | 1.00 (1.00, 1.00) | 0.317          |                   |                |
| NGAL(2-wk)                     | 1.00 (1.00, 1.00) | 0.209          |                   |                |
| Δ NGAL                         | 1.00 (1.00, 1.00) | 0.234          |                   |                |
| πGST (Baseline)                | 1.06 (0.77, 1.45) | 0.744          |                   |                |
| πGST (2-wk)                    | 1.02 (0.97, 1.06) | 0.521          |                   |                |
| Δ πGST                         | 1.00 (1.00, 1.01) | 0.204          |                   |                |
| αGST (Baseline)                | 0.83 (0.42, 1.66) | 0.599          |                   |                |
| αGST (2-wk)                    | 0.97 (0.93, 1.01) | 0.091          |                   |                |
| Δ αGST                         | 1.00 (1.00, 1.00) | 0.780          |                   |                |

|                                |                   |       |
|--------------------------------|-------------------|-------|
| Serum Creatinine<br>(Baseline) | 1.02 (0.99, 1.04) | 0.203 |
|--------------------------------|-------------------|-------|

---

Abbreviations: NGAL, neutrophil gelatinase-associated lipocalin; GST, glutathione S-transferase;  $\Delta$  NGAL,  $\Delta$ NGAL = day 14 NGAL – baseline NGAL; 2-wk, 2 weeks after URS.

Impact of hydronephrosis degree on eGFR and urine biomarkers

**Supplementary table 2.** Impact of baseline eGFR on changes in urinary renal

damage markers in both groups.

| Baseline<br>eGFR<br>(mL/min/1.73 m <sup>2</sup> ) | Ureteral stricture |               | Ureteral stone |               |
|---------------------------------------------------|--------------------|---------------|----------------|---------------|
|                                                   | ≥60<br>n = 40      | <60<br>n = 11 | ≥60<br>n = 108 | <60<br>n = 33 |
| ΔNGAL                                             | 23.8±9.2           | 63.2±24.1     | 25.6±4.9       | 6.0±20.1      |
| <i>p</i> value                                    | 0.132              |               | <b>0.014</b>   |               |
| ΔαGST                                             | 0.8±0.4            | 0.7±0.7       | 0.1±0.1        | 0.5±0.4       |
| <i>p</i> value                                    | 0.857              |               | 0.768          |               |
| ΔπGST                                             | 0.5±0.2            | -0.3±0.6      | 0.7±0.2        | 0.1±0.2       |
| <i>p</i> value                                    | 0.180              |               | 0.216          |               |

*p* value was analyzed by *t*-test if the variables were normally distributed; the Mann-Whitney U-test was used for data that were not normally distributed., P<0.05 was considered statistically significant.

ΔNGAL = Day 14 NGAL – Day 0 NGAL.

Bold value represents statistically significant *p* <0.05.
